# Supplementary material for: Investigating a novel approach to reduce transverse weld scrap in aluminum extrusion using profiled dummy blocks and billets
Source: Research Square preprint supplement (doi:10.21203/rs.3.rs-6838868/v1), 2025-07-01
Supplement: Supplementary file 1 [file 0768eb828a12f87daf34841a.pdf]

## Supporting Information

Investigating a novel approach to reduce transverse weld scrap in aluminum  
extrusion using profiled dummy blocks and billets

Muhammad Umar Farooq <sup>1</sup>, Gregory Oberhausen <sup>1</sup>, Daniel Cooper <sup>1, \*</sup>

<sup>1</sup> University of Michigan, Ann Arbor, Ann Arbor, MI 48109, USA

\*Corresponding author: [drcooper@umich.edu](mailto:drcooper@umich.edu)

The supporting information file contains useful details for understanding the main manuscript, including a comparison between the experimental and simulated transverse weld lengths, as well as photographs of the experimental trials.

24 **S1: Comparison of experimental and simulated transverse weld lengths (using conventional billets)**

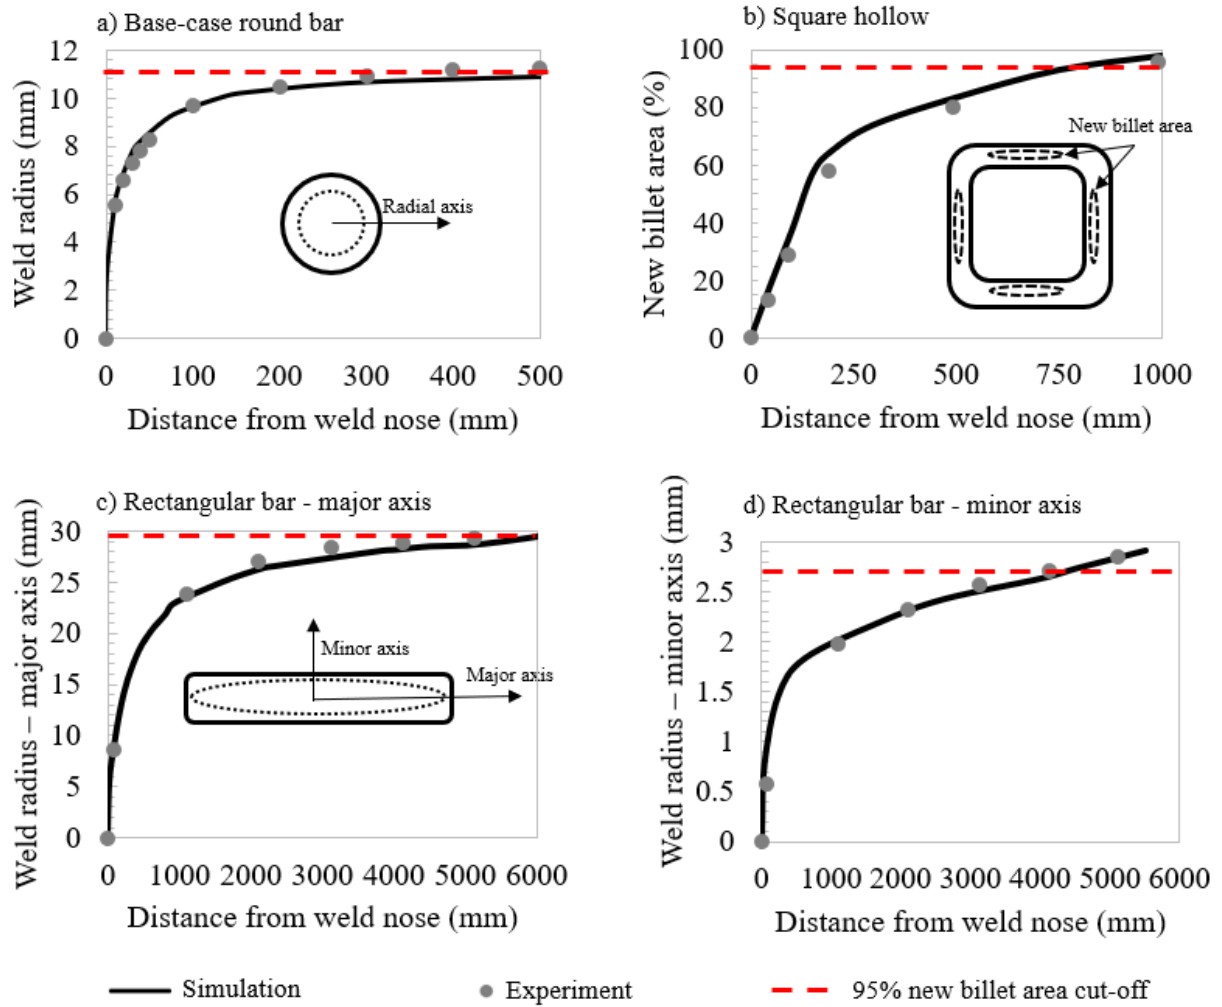

25

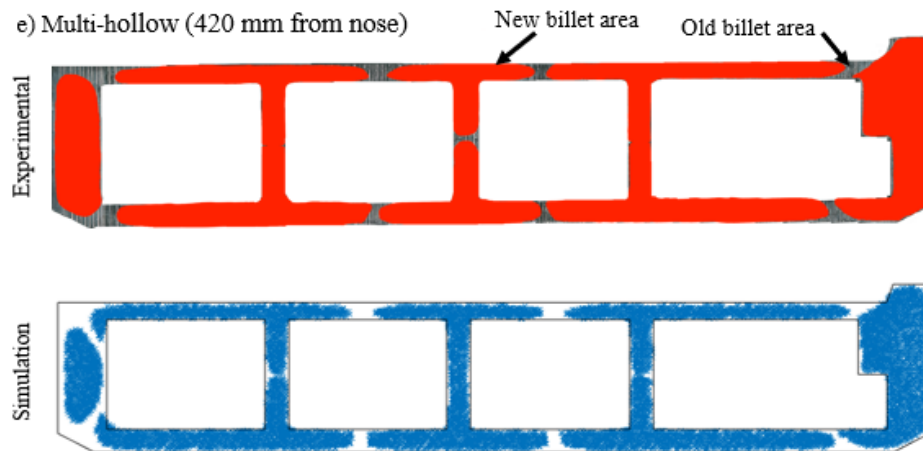

26

27 Figure S1: Comparison of experimental and simulated weld geometries on the (a) base-case round bar, (b)  
 28 square hollow, (c and d) rectangular bar, and (e) multi-hollow profiles.

29 **S2: Photographs of the experimental trial**

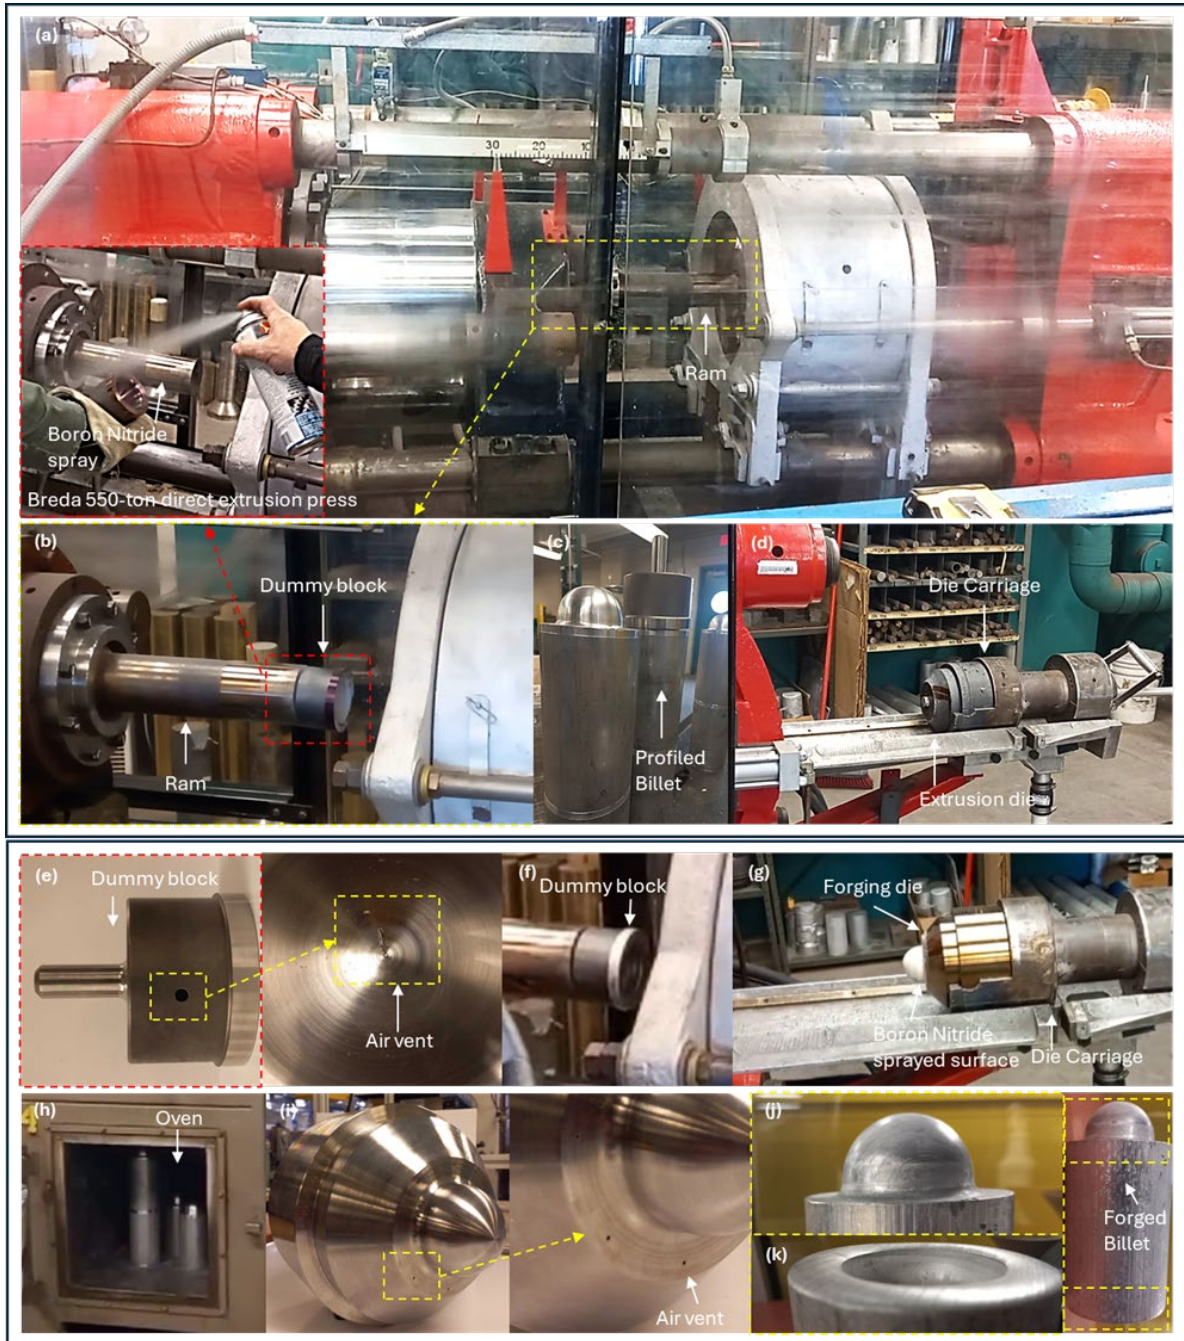

Figure S2: Experimental trial details for extrusion and forging (a) experimental setup, (b) profile-specific dummy block placement on the ram for extrusion, (c) pre-machined profiled billets, (d) die carriage with round bar extrusion die, (e) profile-specific dummy block with air vent for forging, (f) dummy block placement on the ram, (g) die carriage with Boron Nitride sprayed forging die, (h) oven for billet/tooling heating, (i) forging die with air vents and profile specific convex shape, (j) convex geometry of profile-specific forged billet, and (k) concave geometry of profile-specific forged billet.
